# Supplementary material for: A theoretical study of the atmospherically important radical–radical reaction BrO + HO2; the product channel O2(a1Δg) + HOBr is formed with the highest rate
Source: Royal Society of Chemistry journal article supplement (doi:10.1039/c6cp05877a), 2016-01-01
Supplement: c6cp05877a1.pdf [file c6cp05877a1.pdf]

## Supplementary Material for:-

**A theoretical study of the atmospherically important  
radical-radical reaction  $\text{BrO} + \text{HO}_2$ ;  
the product channel  $\text{O}_2(\text{a}^1\Delta_g) + \text{HOBr}$  is formed with the highest rate.**

Ronald Chow <sup>[a]</sup>, Daniel K.W. Mok <sup>[a]</sup>, Edmond P. F. Lee <sup>\*[a],[b]</sup>, and John M. Dyke <sup>\*[b]</sup>

<sup>[a]</sup> Department of Applied Biology and Chemical Technology, Hong Kong Polytechnic University, Hung Hom, Hong Kong

<sup>[b]</sup> School of Chemistry, University of Southampton, Highfield, Southampton SO17 1BJ, United Kingdom e-mail [epl@soton.ac.uk](mailto:epl@soton.ac.uk); [jmdyke@soton.ac.uk](mailto:jmdyke@soton.ac.uk)

Table S1.

Heats of formation ( $\Delta H_{f,298K}$ ; 0 K values in square brackets; best computed values in *italics*) used for calculating the reaction enthalpy ( $\Delta H_{298K}^{RX}$ ) of the BrO + HO<sub>2</sub> reaction channels (1a,1b, 2,3 and 4)

| kcal.mol <sup>-1</sup> | $\Delta H_{f,298K}$ | Reference           | Remarks                                                                                                             |
|------------------------|---------------------|---------------------|---------------------------------------------------------------------------------------------------------------------|
| BrO                    | 30.8                | Grant2010           | from atomization energies at R/UCCSD(T)/CBS+CV+SR+SO)                                                               |
|                        | [32.6]              | As above            |                                                                                                                     |
|                        | [31.4]              | Orn2007             | UCCSD(T)/CBS+CV+SO+rel+T+TQ from Peterson2006                                                                       |
|                        | <i>29.6± 0.4</i>    | <i>Peterson2006</i> | <i>from computed D<sub>0</sub> at UCCSD(T)/CBS+CV+SO+rel+T+TQ</i>                                                   |
|                        | 29.5±0.1            | Kim2006             | ion imaging D <sub>0</sub> ; quoted in Sander2011                                                                   |
|                        | [31.3±0.1]          | As above            |                                                                                                                     |
|                        | 30.4±1.0            | Den2004             | CCSD(T)+CV+T+SO+rel                                                                                                 |
|                        | 30.2±0.4            | Wil1999             | FT-UV D <sub>0</sub> ; quoted in Canneaux2012 suppl.material                                                        |
|                        | 30.1±0.4            | JANAF1998           |                                                                                                                     |
|                        | 28.6±1.4            | Bed1997             | Quoted in Aran1997                                                                                                  |
|                        | 30.4±2              | Orl1996             | average from most direct measurements                                                                               |
|                        | 30.1±0.6            | JANAF1996           | Quoted in Burcat2010                                                                                                |
|                        | <b>30.1±0.7</b>     |                     | <b>(average of all 298 K values, except Orl1996)</b>                                                                |
| HO <sub>2</sub>        | 2.85±0.05           | Ganyecz2015         | a thermo-chemical network, 14 experimental and 7 theoretical reaction enthalpies                                    |
|                        | [3.55±0.05]         | Ganyecz2015         | (as above)                                                                                                          |
|                        | <i>2.84±0.05</i>    | <i>Ganyecz2015</i>  | <i>CCSDTQP/CBS+SR+DBOA</i>                                                                                          |
|                        | 2.93±0.04           | ATcT2014            | ATcT; quoted in Ganyecz2015                                                                                         |
|                        | 2.7±0.9             | Gold2012            | RQCISD(T)/cc-PV $\infty$ QZ//B3LYP/6-311++G(d,p) + bond additivity correction; previous values: 0.5 to 3.0 kcal/mol |
|                        | 2.9                 | Ruscic2011          | Quoted in Gold2012                                                                                                  |
|                        | 3.3                 | Silva2011           | No reference given                                                                                                  |
|                        | 3.17                | Karton2011          | using W4.2 TAE <sub>0K</sub> =165.98kcal/mol and CODATA $\Delta H_{f,298K}$ 's                                      |
|                        | 2.94±0.06           | Burcat2010          | ATcT                                                                                                                |
|                        | [3.61±0.55]         | Csaszar2010         | NEAT                                                                                                                |
|                        | 2.91±0.05           | Grant2009           | ATcT; quoted in Ganyecz2015                                                                                         |
|                        | 2.96±0.14           | Karton2009          | W4.2; quoted in Burcat2010, Ganyecz2015                                                                             |
|                        | 2.91±0.05           | Harding2008         | ATcT; quoted in Grant2009                                                                                           |
|                        | 3.0±0.2             | Feller2008          | UCCSD(T)/CBS(Q;5)+CV+SR+SO; quoted in Grant2009, Ganyecz2015                                                        |
|                        | 2.94±0.06           | Ruscic2006          | ATcT; quoted in Karton2009, Sander2011, Ganyecz2015                                                                 |
|                        | [3.58±1.5]          | Tajti2004           | ATcT; quoted in Csaszar2010                                                                                         |
|                        | 2.96±0.10           | Flowers2004         | CCSD(T)/aug-cc-pCV5Z; quoted in Ganyecz2015                                                                         |

|                                          |             |             |                                                                                                                                                                 |
|------------------------------------------|-------------|-------------|-----------------------------------------------------------------------------------------------------------------------------------------------------------------|
|                                          | [3.97]      | Henry2002   | G3X-RAD                                                                                                                                                         |
|                                          | 3.2±0.5     | Ramond2002  | Photoelectron detachment; quoted in Ganyecz2015                                                                                                                 |
|                                          | 3.3±0.8     | Litorja1998 | photoionization mass spectrom.; quoted in Ganyecz2015                                                                                                           |
|                                          | 2.32±0.72   | JANAF1998   |                                                                                                                                                                 |
|                                          | 4.0±0.6     | Esp1993     | MP4/TZ(2df,p)+post-MP4 correction                                                                                                                               |
|                                          | 3.0         | Hill1984    | From T dependent rate coefficients; quoted in Burcat2010                                                                                                        |
|                                          | 3.5±1.0     | Shum1983    | Review; quoted in Ganyecz2015                                                                                                                                   |
|                                          | 3.0±0.5     |             | (averaged of all 298 K values, except the smallest JANAF1998, the largest MP4 Esp1993 values and earlier values quoted in Ganyecz2015 with large uncertainties) |
| HOBr                                     | -15.3±0.60  | Den2006     | CCSD(T)+CV+T+SO+rel; quoted by Sandar2011JPL                                                                                                                    |
|                                          | [-11.4±0.4] | Joe2001     | Thermochemical cycle                                                                                                                                            |
|                                          | -15.2±1.1   | Esp1999     | Best average theoretical value                                                                                                                                  |
|                                          | -14.5       | Esp1999     | CCSD(T)/CBS                                                                                                                                                     |
|                                          | -19.4       | Jur1999     | MP4/CBS//MP2/6-31G(d')                                                                                                                                          |
|                                          | [-14.8]     | Jur1999     | B3LYP/6-311G(3df,3pd); recommended                                                                                                                              |
|                                          | -18.2       | Jur1999     | B3LYP/6-311G(3df,3pd)                                                                                                                                           |
|                                          | -17.5       | Mes1999     | G2                                                                                                                                                              |
|                                          | -14.5±0.3   | Has1997     | Recommended value; quoted in Canneaux2012 suppl. Material and Sander2011 JPL-NASA                                                                               |
|                                          | -14.3±1     | Loc1996     | Quoted and favoured by Orn2007 & San2001; quoted by Den2006                                                                                                     |
|                                          | [-11.8±1]   | As above    |                                                                                                                                                                 |
|                                          | -14.1±2     | Orl1996     | Average from most direct measurements                                                                                                                           |
|                                          | -15.8       | Gre1996     | Bond additivity; quoted in Mes1999                                                                                                                              |
|                                          | [-10.9±1]   | JANAF1994   | Quoted in Jur1999, Fran1994, Guha1999                                                                                                                           |
|                                          | -14±2       | DeM1994     | Quoted in Esp1999                                                                                                                                               |
|                                          | -13.59±0.42 | Rus1994     | Corrected for ΔH <sub>f</sub> (OH) given in San2001; quoted in Has1997                                                                                          |
|                                          | -13.9±0.5   | Rus1994     | Quoted by Den2006 as the accepted value                                                                                                                         |
|                                          | -14.2       | McG1994     | G2; quoted in San2001                                                                                                                                           |
|                                          | -14.4±0.9   |             | (average of 298 K values >-13.5 and <-15.5 kcal/mol)                                                                                                            |
| O <sub>2</sub> ( $X^3\Sigma_g^-$ )       | 0           |             | By definition for the ground $X^3\Sigma_g^-$ electronic state.                                                                                                  |
| O <sub>2</sub> ( $\tilde{a}^1\Delta_g$ ) | 22.54±0.01  | Huber1998   | Infrared solar spectrum; quoted in Sandar2011 JPL                                                                                                               |
|                                          | 22.54       |             |                                                                                                                                                                 |
| HBr                                      | -8.64±0.04  | Burcat2010  | ATcT                                                                                                                                                            |
|                                          | -8.6        | Feller2003  | CCSD(T)/CBS with aug-cc-pVnZ where n = T,Q, and 5                                                                                                               |
|                                          | -8.71       | JANAF1998   | Absorption spectrum                                                                                                                                             |

|                |             |                           |                                                                                                                         |
|----------------|-------------|---------------------------|-------------------------------------------------------------------------------------------------------------------------|
|                | -8.67±0.04  | Cox1989                   | CODATA                                                                                                                  |
|                | -8.67±0.04  | Gurvich1989               | Quoted in Burcat2010                                                                                                    |
|                | -8.66±0.06  |                           | (average of all 298 K values)                                                                                           |
| O <sub>3</sub> | 38.1        | Mor2012                   | ccCA                                                                                                                    |
|                | 34.9        | Mor2012                   | G3                                                                                                                      |
|                | 33.88±0.04  | Burcat2010                | ATcT                                                                                                                    |
|                | 35.4        | Burcat2010                | G3MP2B3                                                                                                                 |
|                | 36.8        | <i>Fab2005</i>            | <i>WIU; quoted in Mor2012 and Burcat2010</i>                                                                            |
|                | 33.87±0.01  | Ruscic2004                | ATcT; quoted in Sandar2011JPL                                                                                           |
|                | 36.8        | <i>Haw2002</i>            | <i>CCSD(T)/CBS+SR//B3LYP/6-31G(2df,p); quoted in Mor2012</i>                                                            |
|                | 33.89       | Tan1999                   | VUV laser-induced fluorescence spectroscopy                                                                             |
|                | 34.1        | JANAF1998                 | calorimetric measurements                                                                                               |
|                | 33.9±0.5    | Gurvich1991               | Calorimetric measurement of the enthalpy of dissociation (O <sub>3</sub> )                                              |
|                | 33.9        | Gurvich1989               | Quoted in Burcat2010                                                                                                    |
|                | 34.7±2.0    |                           | (average of all 298 K values; except the ccCA value)                                                                    |
| OH             | 8.96±0.01   | Ruscic2015;<br>Ruscic2014 | ATcT (agree with earlier values in Ref. 30 and 31)                                                                      |
|                | 8.9±0.9     | Gold2012                  | RQCISD(T)/cc-PV <sub>∞</sub> QZ//B3LYP/6-311++G(d,p) + bond additivity correction; previous values: 8.9 to 9.4 kcal/mol |
|                | 9.0         | Ruscic2011                | ATcT; quoted in Gold2012                                                                                                |
|                | 8.89±0.09   | Ruscic2012                | Position ion cycle (photoionization and photoelectron measurements) for Ruscic2001                                      |
|                | 8.93±0.01   | Burcat2010                | ATcT                                                                                                                    |
|                | 8.91± 0.07  | <i>Ruscic2002</i>         | <i>Recommended value at 298 K; quoted in Burcat2010</i>                                                                 |
|                | [8.85±0.07] | Ruscic2002                | Recommended value at 0 K                                                                                                |
|                | [8.85±0.18] | <i>Ruscic2002</i>         | <i>CCSD(T)(FC)/CBS with unc-cc-pVnZ basis set; FCI for further corrections in the atomization energy.</i>               |
|                | [8.85±0.18] | Ruscic2002                | PIMS experiment                                                                                                         |
|                | [8.86±0.18] | Ruscic2002                | PFI-PE30 experiment                                                                                                     |
|                | [8.83±0.12] | Ruscic2002                | PFI-PEPICO experiment                                                                                                   |
|                | [8.92±0.03] | Ruscic2002                | photodissociation of water                                                                                              |
|                | 8.92±0.16   | Herbon2002                | Shock tube measurement                                                                                                  |
|                | [8.68]      | Henry2002                 | W2                                                                                                                      |
|                | 9.319       | JANAF1998                 |                                                                                                                         |
|                | [9.18±0.29] | JANAF1998                 | Spectroscopic determination                                                                                             |
| [8.83±0.18]    | Wie1992     | Positive ion cycle        |                                                                                                                         |
| 8.89±0.09      | Gurvich1991 | D <sub>0</sub> (H-OH)     |                                                                                                                         |

|         |              |                                            |                                                                                                                                                                                                                                       |
|---------|--------------|--------------------------------------------|---------------------------------------------------------------------------------------------------------------------------------------------------------------------------------------------------------------------------------------|
|         | [9.35±0.05]  | Gurvich1989                                | Spectroscopic determination of D <sub>0</sub> (OH)                                                                                                                                                                                    |
|         | 9.8          | Pople1985                                  | MP4/6-311+G(2df,p)//UHF/6-31G(d)                                                                                                                                                                                                      |
|         | [9.26±0.29]  | Barrow1956                                 | measurement of D <sub>0</sub> (OH, A <sup>2</sup> Σ <sup>+</sup> ); quoted in Ruscic2001                                                                                                                                              |
|         | 8.97±0.35    |                                            | (average of all 298 K values; except the MP4 value of Pople1985)                                                                                                                                                                      |
| BrOO    | 28.9±1.5     | Grant2010                                  | RCCSD(T)/CBS(Q5)+CV+SR+SO; quoted in Sandar2011-JPL                                                                                                                                                                                   |
|         | 26±1         | Pacios1999                                 | CCSD(T)/AREP/TZ(2df)//UMP2/AREP/TZ(2df); quoted in Grant2010                                                                                                                                                                          |
|         | [28±1]       | As above                                   |                                                                                                                                                                                                                                       |
|         | 26.0±9.6     | JANAF1996                                  | Based on a trend analysis of Δ <sub>f</sub> H <sub>0</sub> <sup>°</sup> (OCIO)/D <sub>0</sub> <sup>°</sup> (ClO) and the accepted value of D <sub>0</sub> <sup>°</sup> (BrO); quoted in Burcat2010 and Sandar2003-JPL from JANAF1996. |
|         | [27.8±9.6]   | As above                                   |                                                                                                                                                                                                                                       |
|         | 27.0±1.9     |                                            | (average of all 298 K values)                                                                                                                                                                                                         |
| OBrO    | 40.6±1.5     | Grant2010                                  | RCCSD(T)/CBS(Q5)+CV+SR+SO; also in Sandar2010                                                                                                                                                                                         |
|         | 39.2±1.7     | Lee2004                                    | CCSD(T, Full)/6-311+G(3d,f)                                                                                                                                                                                                           |
|         | 39.2±1.1     | Klemm2001                                  | From appearance energy of BrO <sup>+</sup> from OBrO; quoted in Sandar2010-JPL                                                                                                                                                        |
|         | [41.4±1.0]   | As above                                   |                                                                                                                                                                                                                                       |
|         | [39.6±1.9]   | Klemm2001                                  | Corrected G2 value of Alcami1998 (spin-orbit contribution for BrO).                                                                                                                                                                   |
|         | 38.9±1.9     | Klemm2001                                  | Corrected CCSD(T) value of ref. 19 (spin-orbit contribution for BrO).                                                                                                                                                                 |
|         | [39.4±1.9]   | Klemm2001                                  | As above                                                                                                                                                                                                                              |
|         | 30±3         | Pacios1999                                 | CCSD(T)/AREP/TZ(2df)//UMP2/AREP/TZ(2df); quoted in Grant2010                                                                                                                                                                          |
|         | [32±3]       | As above                                   |                                                                                                                                                                                                                                       |
|         | [37.5]       | Alcami1998                                 | G2; quoted in Klemm2001                                                                                                                                                                                                               |
|         | 34.4±3       | Workman1998                                | CCSD(T)/6-311+G(3df)//CCSD(T)/6-311G(2df); quoted in Klemm2001                                                                                                                                                                        |
|         | [34.5±3]     | As above                                   |                                                                                                                                                                                                                                       |
|         | 36.3±6.0     | JANAF1996                                  | Quoted in Burcat2010 from JANAF1996.                                                                                                                                                                                                  |
|         | 39.2±1.1     | JANAF1996                                  | Quoted in Sandar2003-JPL from JANAF1996.                                                                                                                                                                                              |
|         | [38.6±6]     | JANAF1996                                  | Based on a trend analysis of Δ <sub>f</sub> H <sub>0</sub> <sup>°</sup> (OCIO)/D <sub>0</sub> <sup>°</sup> (ClO) and the accepted value of D <sub>0</sub> <sup>°</sup> (BrO); quoted in Klemm2001                                     |
|         | [31.55]      | Huie1995                                   | Quoted in Klemm2001; estimated from ΔG(BrO <sub>2</sub> (aq))                                                                                                                                                                         |
| [20.79] | Cottrell1954 | Quoted in Klemm2001; derived from D(O-BrO) |                                                                                                                                                                                                                                       |

|                        |             |  |                                                                                                                   |
|------------------------|-------------|--|-------------------------------------------------------------------------------------------------------------------|
|                        | 39.4±1.2    |  | (average of all 298 K values, except the values of JANAF1996 (the lower value of 36.3), Pacios1999 & Workman1998) |
| $\Delta H_{298K}^{RX}$ | -47.5±2.1   |  | using the averaged $\Delta H_{f,298K}$ values                                                                     |
| (channel               | -47.7±1.1   |  | using the best theoretical $\Delta H_{f,298K}$ values                                                             |
| 1(a))                  | -47.7       |  | {present study; UCCSD(T)/CBS + SO(BrO)}                                                                           |
|                        | -47.5       |  | {present study; BD(TQ)/CBS + SO(BrO)}                                                                             |
| $\Delta H_{298K}^{RX}$ | -25.0±2.1   |  | using $\Delta H_{f,298K}$ of $O_2$ $a^1\Delta_g = 22.5$ kcal.mol <sup>-1</sup> from JPL 10-6                      |
| (channel               | -25.2±1.5   |  | using the best theoretical $\Delta H_{f,298K}$ values                                                             |
| 1(b))                  | -25.0       |  | {present study; BD(TQ)/CBS + SO(BrO)}                                                                             |
| $\Delta H_{298K}^{RX}$ | -7.1±3.3    |  | using the averaged $\Delta H_{f,298K}$ values                                                                     |
| (channel               | -4.2(>±0.5) |  | using the best theoretical $\Delta H_{f,298K}$ values                                                             |
| 2)                     | -4.3        |  | {present study; BD(TQ)/CBS + SO(BrO)}                                                                             |
| $\Delta H_{298K}^{RX}$ | 15.3±2.8    |  | using the averaged $\Delta H_{f,298K}$ values                                                                     |
| (channel               | 17.1±2.0    |  | using the best theoretical $\Delta H_{f,298K}$ values                                                             |
| 3)                     | 14.9        |  | {present study; BD(TQ)/CBS + SO(BrO)}                                                                             |
| $\Delta H_{298K}^{RX}$ | 2.9±3.5     |  | using the averaged $\Delta H_{f,298K}$ values                                                                     |
| (channel               |             |  |                                                                                                                   |
| 4)                     |             |  |                                                                                                                   |
|                        | 5.4±2.0     |  | using the best theoretical $\Delta H_{f,298K}$ values                                                             |
|                        | 5.9         |  | {present study; BD(TQ)/CBS + SO(BrO)}                                                                             |

For BrO, the ground electronic state is  $X^2\Pi$ , and the experimental equilibrium spin-orbit (SO) state separation between the  $X_2^2\Pi_{1/2}$  and  $X_1^2\Pi_{3/2}$  states is 975.43 cm<sup>-1</sup> (or 2.7889 kcal.mol<sup>-1</sup>) [B. J. Drouin, C. E. Miller, H. S. P. Muller, E. A. Cohen, *J. Mol.Spectrosc.* 2001, **205**, 128.]. Using this SO splitting, the  $X_2^2\Pi_{3/2}$  SO state of BrO should be lower than the unperturbed  $X^2\Pi$  state by 1.3944 kcal.mol<sup>-1</sup>. This reduces the computed  $\Delta H_{298K}^{RX}$  value by the same amount.

Alcami1998: Alcami, M. and Cooper, I. L. *Ab initio* calculations on bromine oxide and dioxides and their corresponding anions. *J. Chem. Phys.* 1998, 108, 9414.

Aran1997: Aranda, A.; LeBras, G.; LaVerdet, G.; Poulet, G. The BrO + CH<sub>3</sub>O<sub>2</sub> Reaction: Kinetics and Role in the Atmospheric Ozone Budget. *Geophys. Res. Lett.* 1997, 24, 2745–2748.

ATcT2014: Active Thermochemical Tables, <http://atct.anl.gov/> (accessed October 13, 2014).

Barrow1956: Barrow, R. *F. Ark. Fys.* 1956, 11, 281.

Bed1997: Bedjanian, Y.; LeBras, G.; Poulet, G. Kinetic Study of the Br+IO, I+BrO and Br+I<sub>2</sub> Reactions. Heat of Formation of the BrO Radical. *Chem. Phys. Lett.* 1997, 266, 233–238.

Burcat2010: A. Burcat, B. Ruscic, Third Millennium Ideal Gas and Condensed Phase Thermochemical Database for Combustion with Updates from Active Thermochemical Tables,

Chemistry Division, Argonne National Laboratory, Argonne, Illinois, September 2005, (last update: March 15, 2010); this database is available in electronic form at:

<ftp://ftp.technion.ac.il/pub/supported/aetdd/thermodynamics>.

Canneaux2012: Canneaux, S.; Hammaeher, C.; Cours, T.; Louis, F. and Ribaucour, M. Theoretical Study of H-Abstraction Reactions from CH<sub>3</sub>Cl and CH<sub>3</sub>Br Molecules by ClO and BrO Radicals. J. Phys. Chem. A 2012, 116, 4396–4408.

Cottrell1954: Cottrell, T. L. The Strength of Chemical Bonds; Butterworth: London, 1954; P.221-81.

Cox1989: Cox, J. D., D. D. Wagman and V. A. Medvedev CODATA Key Values for Thermodynamics; Hemisphere Publishing Corp.: New York, 1989.

Csaszar2010: Csaszar, A.G. and Furtenbacher, T. From a Network of Computed Reaction Enthalpies to Atom-Based Thermochemistry (NEAT). Chem. Eur. J. 2010, 16, 4826 – 4835.

DeM1994: DeMore, W.B.; Sander, S.P.; Golden, D.M. ; Hampson, R.F.; Kurylo, M.J.; Howard, C.J.; Ravishankara, A.R.; Kolb, C.E. and Molina, M. Chemical kinetics and Photochemical Data for Use in Stratospheric Modeling, Jet Propulsion Lab., Pasadena, CA, 1994, JPL Publ. 94-26.

Den2004: Denis, P. A. On the Performance of CCSD(T) and CCSDT in the Study of Molecules with Multiconfigurational Character: Halogen Oxides, HSO, BN and O<sub>3</sub>. Chem. Phys. Lett. 2004, 395, 12–20.

Den2006: Denis, P. A. Thermochemistry of the Hypobromous and Hypochlorous Acids, HOBr and HOCl. J. Phys. Chem. A 2006, 110, 5887–5892.

Esp1993: Espinosa-Garcia, J. New theoretical value of the enthalpy of formation of the OOH radical. Mol. Phys. 1993, 79, 445-447.

Esp1999: Espinosa-Garcia, J. Theoretical Enthalpies of Formation of RO<sub>x</sub> (R = H, CH<sub>3</sub>; X = F, Cl, Br) Compounds. Chem. Phys. Lett. 1999, 315, 239–247.

Fan2005: Fabian, W. M. F.; Kalcher, J. and Janoschek, R. Stationary points on the energy hypersurface of the reaction O<sub>3</sub> + H• → [•O<sub>3</sub>H]\* ⇌ O<sub>2</sub> + •OH and thermodynamic functions of •O<sub>3</sub>H at G3MP2B3, CCSD(T)-CBS (W1U) and MR-ACPF-CBS levels of theory. Theor. Chem. Acc. 2005, 114, 182-188.

Feller2003: Feller, D.; Peterson, K.A.; de John, W.A. and Dixon, D.A. Performance of coupled cluster theory in thermochemical calculations of small halogenated compounds. J. Chem. Phys. 2003, 118, 3510.

Feller2008: Feller, D.; Peterson, K.; Dixon, D. A Survey of Factors Contributing to Accurate Theoretical Predictions of Atomization Energies and Molecular Structures. J. Chem. Phys. 2008, 129, 204105.

Flowers2004: Flowers, B. A.; Szalay, P. G.; Vazquez, J.; Stanton, J. F.; Kállay, M.; Gauss, J.; Császár, A. G. Benchmark Thermochemistry of the Hydroperoxyl Radical. J. Phys. Chem. A

2004,108, 3195–3199.

Ganyecz2015: Ganyecz, Á.; Csontos, J.; Nagy, B. and Kállay, M. Theoretical and Thermochemical Network Approaches To Determine the Heats of Formation for HO<sub>2</sub> and Its Ionic Counterparts. *J. Phys. Chem. A* 2015,119,1164-1176.

Gold2012: Goldsmith, C.F.; Magoon, G.R. and Green, W.H. Database of Small Molecule Thermochemistry for Combustion. *J. Phys. Chem. A* 2012, 116, 9033–9057.

Grant2009: Grant, D. J. ; Dixon, D. A. ; Francisco, J. S. ; Feller, D. ; Peterson, K. A. . Heats of Formation of the H<sub>1,2</sub>O<sub>m</sub>S<sub>n</sub> (m, n = 0–3) Molecules from Electronic Structure Calculations. *J. Phys. Chem. A* 2009,113, 11343–11353.

Grant2010: Grant, D. J. ; Garner III, E. B.; Matus, M. H.; Nguyen, M. T.; Peterson, K. A.; Francisco, J. S. and Dixon, D. A. Thermodynamic Properties of the XO<sub>2</sub>, X<sub>2</sub>O, XYO, X<sub>2</sub>O<sub>2</sub>, and XYO<sub>2</sub> (X, Y = Cl, Br, and I) Isomers. *J. Phys. Chem. A* 2010, 114, 4254–4265.

Guha1999: Guha, S. and Francisco, J.S. An Examination of the Reaction Pathways for the HOOOBr and HOOBrO Complexes Formed from the HO<sub>2</sub> + BrO Reaction. *J. Phys. Chem. A* 1999, 103, 8000-8007.

Gurvich1989: Gurvich, L. V.; Veyts, I. V.; Alcock, C. B. Thermodynamic Properties of Individual Substances; Hemisphere: New York, 1989; Vol. 1.

Gurvich1991: Gurvich, L. V., I. V. Veyts and C. B. Alcock Thermodynamic Properties of Individual Substances,, Fourth ed.; Hemisphere Publishing Corp.: New York, 1991; Vol. 2.

Harding2008: Active Thermochemical Tables (ATcT) using the Core (Argonne) Thermochemical Network Version 1.064. Harding, M. E.; Va'zquez, J.; Ruscic, B.; Wilson, A. K.; Gauss, J.; Stanton, J. F. *J. Chem. Phys.* **2008**, *128*, 114111. Ruscic, B.; Pinzon, R. E.; Morton, M. L.; Laszewski, G. v.; Bittner, S.; Nijssure, S. G.; Amin, K. A.; Minkoff, M.; Wagner, A. F. *J. Phys. Chem. A* **2004**, *108*, 9979. Ruscic, B.; Pinzon, R. E.; Laszewski, G. v.; Kodeboyina, D.; Burcat, A.; Leahy, D.; Montoya, D.; Wagner, A. F. *J. Phys. Conf. Ser.* **2005**, *16*, 561. Ruscic, B.; Pinzon, R. E.; Morton, M. L.; Srinivasan, N. K.; Su, M.-C.; Sutherland, J. W.; Michael, J. V. *J. Phys. Chem. A* **2006**, *110*, 6592.

Has1997: Hassanzadeh, P. and Irikura, K. K. Nearly *ab Initio* Thermochemistry: The Use of Reaction Schemes. Application to IO and HOI. *J. Phys. Chem. A* 1997,101,1580.

Haw2002: Haworth, N.L. and Bacskay, G.B. Heats of formation of phosphorus compounds determined by current methods of computational quantum chemistry. *J. Chem. Phys.* 2002, 117, 11175.

Henry2002: Henry, D.J.; Parkinson, C.J. and Radom, L. *J. Phys. Chem. A* 2002, 106, 7927-7936.

Herbon2002: Herbon, J.T.; Hanson, R.K.; Golden, D. M. and Bowman, C. T. Proceedings of the Combustion Institute, 2002, 29, 1201–1208.

Hill1984: Hills, A.J. and Howard, C.J. Rate coefficient temperature dependence and branching ratio for the OH+ClO reaction. *J. Chem. Phys.* 1984, 81, 4458. <http://dx.doi.org/10.1063/1.447414>.

Huber1998: Constants of Diatomic Molecules; Huber, K. P. and G. Herzberg, Eds.; National



Institute of Standards and Technology, 1998.

Huie1995: Huie, R. E.; Laszlo, B. The Atmospheric Chemistry of Iodine Compounds. In Halon Replacements: Technology and Science; ACS Symposium Series 611; American Chemical Society: Washington, DC, 1995; p 31.

JANAF1994: Chase, M. W.; Davies, C. A.; Downey, J. R.; Frurip, D. J.; McDonald, R. A.; Syverud, A. N. J. Phys. Chem. Ref. Data Suppl. 1985, 1.

JANAF1996: Chase, M. W., "NIST-JANAF Thermochemical Tables for the Bromine Oxide," J. Phys. Chem. Ref. Data 1996, 25, 1069-1111.

JANAF1998: Chase, M. W., Jr. NIST-JANAF Thermochemical Tables, 4th ed.; J. Phys. Chem. Ref. Data, Monograph 1998, 9.

Joe2001: Joens, J. A. The Dissociation Energy of  $\text{OH}(\text{X}^2\Pi_{3/2})$  and the Enthalpy of Formation of  $\text{OH}(\text{X}^2\Pi_{3/2})$ ,  $\text{ClOH}$ , and  $\text{BrOH}$  from Thermochemical Cycles. J. Phys. Chem. A 2001, 105, 11041–11044.

Jur1999: Jursic, B. S. High Level *Ab Initio* and Density Functional Theory Study of Bond Dissociation Energy and Enthalpy of Formation for Hypochloric and Hypobromic Acids. J. Mol. Struct.: THEOCHEM 1999, 467, 173–179.

Karton2009: Karton, A.; Parthiban, S. and Martin, J.M.L. Post-CCSD(T) *ab Initio* Thermochemistry of Halogen Oxides and Related Hydrides  $\text{XOX}$ ,  $\text{XOOX}$ ,  $\text{HOX}$ ,  $\text{XO}_n$ , and  $\text{HXO}_n$  ( $\text{X} = \text{F}, \text{Cl}$ ), and Evaluation of DFT Methods for These Systems. J. Phys. Chem. A 2009, 113, 4802–4816.

Karton2011: Karton, A.; Daon, S.; Martin, J. M. L. W4-11: A high-confidence benchmark dataset for computational thermochemistry derived from first-principles W4 data. Chem. Phys. Letters, 510 (2011) 165–178.

Kim2006: Kim, H., Dooley, J. S.; Johnson, E. R. and North, S. W. Photodissociation of the  $\text{BrO}$  radical using velocity map ion imaging: Excited state dynamics and accurate  $D_0^0(\text{BrO})$  evaluation. J. Chem. Phys. 2006, **124**, 134304.

Klemm2001: Klemm, R. B.; Thorn, R.P.; Stief, L.J.; Buckley, T.J. and Johnson, R.D. Heat of Formation of  $\text{OBrO}$ : Experimental Photoionization Study. J. Phys. Chem. A 2001, 105, 1638-1642.

Lee2004: Lee, S.Y. Computational Study of Enthalpies of Formation of  $\text{OXO}$  ( $\text{X} = \text{Cl}, \text{Br}, \text{and I}$ ) and Their Anions. J. Phys. Chem. A, 2004, 108, 10754-10761.

Litorja1998: Litorja, M.; Ruscic, B. A Photoionization Study of the Hydroperoxyl Radical,  $\text{HO}_2$ , and Hydrogen Peroxide,  $\text{H}_2\text{O}_2$ . J. Electron Spectrosc. Relat. Phenom. 1998, 97, 131–146.

Loc1996: Lock, M.; Barnes, R. J.; Sinha, A. Near-Threshold Photodissociation Dynamics of  $\text{Hobr}$ : Determination of Product State Distribution, Vector Correlation, and Heat of Formation. J. Phys. Chem. 1996, 100, 7972–7980.

McG1994: McGrath, M.P. and Rowland, F.S. J. Phys. Chem. 1994, 98, 4773.

Mes1999: Messer, B. M.; Elrod, M. J.; Theoretical, A. Study of  $\text{ROx}$  ( $\text{R} = \text{H}, \text{CH}_3$ ;  $\text{X} = \text{F}, \text{Cl}, \text{Br}$ )

Enthalpies of Formation, Ionization Potentials and Fluoride Affinities. Chem. Phys. Lett. 1999, 301, 10–18.

Mor2012: Morgon, N.H. Enthalpies of Formation of Phosphorus and Oxygen Compounds Determined by the Correlation Consistent Composite Approach. Int. J. Quantum Chemistry 2012, 112, 3256–3260.

Orl1996: Orlando, J. J.; Tyndall, G. S. Rate Coefficients for the Thermal Decomposition of BrONO<sub>2</sub> and the Heat of Formation of BrONO<sub>2</sub>. J. Phys. Chem. 1996, 100, 19398–19405.

Orn2007: Ornellas, F. R. Thermochemistry of New Molecular Species: SBr and HSBBr. J. Chem. Phys. 2007, 126, 204314; DOI: 10.1063/1.2737776.

Pacios1999: Pacios, L.F. and Gomez, P.C. Bonding in bromine oxides: Isomers of BrO<sub>2</sub>, Br<sub>2</sub>O<sub>2</sub> and BrO<sub>3</sub>. J. Mol. Struct. (Theochem) 1999, 467, 223-231.

Pasadena, California, February 1, 2003, <http://jpldataeval.jpl.nasa.gov/>.

Peterson2006: Peterson, K. A.; Shepler, B. C.; Figgen, D.; Stoll, H. On the Spectroscopic and Thermochemical Properties of ClO, BrO, IO, and Their Anions. J. Phys. Chem. A 2006, 110, 13877–13883.

Pople1985: Pople, J.A.; Luke, B.T.; Frisch, M.J. and Binkley, J.S. Theoretical Thermochemistry. 1. Heats of Formation of Neutral AH, Molecules (A = Li to Cl). J. Phys. Chem. 1985, 89, 2198-2203.

Ramond2002: Ramond, T.; Blanksby, S.; Kato, S.; Bierbaum, V.; Davico, G.; Schwartz, R.; Lineberger, W.; Ellison, G. Heat of Formation of the Hydroperoxyl Radical HOO Via Negative Ion Studies. J. Phys. Chem. A 2002, 106, 9641–9647.

Rus1994: Ruscic, B.; Berkowitz, J. Experimental determination of  $\Delta H_f^0(\text{HOBr})$  and ionization potentials (HOBr): Implications for corresponding properties of HOI. J. Chem. Phys. 1994, 101, 7795-7803.

Ruscic2001: Ruscic, B.; Feller, D.; Dixon, D.A.; Peterson, K.A.; Harding, L.B.; Asher, R.L. and Wagner, A.F. Evidence for a Lower Enthalpy of Formation of Hydroxyl Radical and a Lower Gas-Phase Bond Dissociation Energy of Water. J. Phys. Chem A 2001, 105, 1-4.

Ruscic2002: Ruscic, B.; Wagner, A.F.; Harding, L.B.; Asher, R.L.; Feller, D.; Dixon, D.A.; Peterson, K.A.; Song, Y.; Qian, X.; Ng, C-Y.; Liu, J.; Chen, W. and Schwenke, D.W. On the Enthalpy of Formation of Hydroxyl Radical and Gas-Phase Bond Dissociation Energies of Water and Hydroxyl. J. Phys. Chem. A 2002, 106, 2727-2747.

Ruscic2004: Ruscic, B.; Pinzon, R.E.; Morton, M.L.; von Laszewski, G.; Bittner, S.J.; Nijssure, S.G.; Amin, K. A.; Minkoff, M. and Wagner, A.F. Introduction to Active Thermochemical Tables: Several “Key” Enthalpies of Formation Revisited. J. Phys. Chem. A, 2004, 108, 9979-9997.

Ruscic2006 ATcT: Ruscic, B.; Pinzon, R. E.; Morton, M. L.; Srinivasan, N. K.; Su, M.-C.; Sutherland, J. W.; Michael, J. V. Active Thermochemical Tables: Accurate Enthalpy of Formation of Hydroperoxyl Radical, HO<sub>2</sub>. J. Phys. Chem. A 2006, 110, 6592-6601.

Ruscic2011: Ruscic, B. Active Thermochemical Tables: version Alpha 1.110 of the Core (Argonne) Thermochemical Network, release date 04.02.2011.

Ruscic2014: Ruscic, B.; Feller, D.; Peterson, K. A. Active Thermochemical Tables: Dissociation Energies of Several Homonuclear First-Row Diatomics and Related Thermochemical Values. *Theor. Chem. Acc.* 2014, 133, 1415/1–12.

Ruscic2015: Ruscic, B. Active Thermochemical Tables: Sequential Bond Dissociation Enthalpies of Methane, Ethane, and Methanol and the Related Thermochemistry. *J. Phys. Chem. A* 2015, 119, 7810–7837.

San2001: Santos, C. M. P.; Faria, R. B.; Machuca-Herrera, J. O.; Machado, S. D. Equilibrium Geometry, Vibrational Frequencies, and Heat of Formation of HOBr, HBrO<sub>2</sub>, and HBrO<sub>3</sub> Isomers. *Can. J. Chem.-Rev. Can. Chim.* 2001, 79, 1135–1144.

Sandar2003-JPL: S. P. Sander, R. R. Friedl, D. M. Golden, M. J. Kurylo, R. E. Huie, V. L. Orkin, G. K. Moortgat, A. R. Ravishankara, C. E. Kolb, M. J. Molina and B. J. Finlayson-Pitts, JPL Publication 02-25, Chemical Kinetics and Photochemical Data for Use in Atmospheric Studies, Evaluation Number 14, National Aeronautics and Space Administration, Jet Propulsion Laboratory, California Institute of Technology

Sander2011: Sander, S. P., J. Abbatt, J. R. Barker, J. B. Burkholder, R. R. Friedl, D. M. Golden, R. E. Huie, C. E. Kolb, M. J. Kurylo, G. K. Moortgat, V. L. Orkin and P. H. Wine "Chemical Kinetics and Photochemical Data for Use in Atmospheric Studies, Evaluation No. 17," JPL Publication 10-6, Jet Propulsion Laboratory, California Institute of Technology, Pasadena, 2011.

Shum1983: Shum, L.; Benson, S. Review of the Heat of Formation of the Hydroperoxyl Radical. *J. Phys. Chem.* 1983, 87, 3479–3482.

Silva2011: da Silva, G. Kinetics and Mechanism of the Glyoxal + HO<sub>2</sub> Reaction: Conversion of HO<sub>2</sub> to OH by Carbonyls. *J. Phys. Chem. A* 2011, 115, 291-297.

Tajti2004: Tajti, A.; Szalay, P. G.; Csaszar, A. G.; Kállay, M.; Gauss, J.; Valeev, E. F.; Flowers, B. A.; Vázquez, J. and Stanton, J. F. HEAT: High accuracy extrapolated *ab initio* thermochemistry. *J. Chem. Phys.* 2004, 121, 11599 – 11613.

Tan1999: Taniguchi, N.; Takahashi, K.; Matsumi, Y.; Dylewski, S.M.; Geiser, J.D. and Houston, P.L. Determination of the heat of formation of O<sub>3</sub> using vacuum ultraviolet laser-induced fluorescence spectroscopy and two-dimensional product imaging techniques. *J. Chem. Phys.* 1999, 111, 6350

Wie1992: Wiedmann, R.T.; Tonkyn, R.G. and White, M.G. Rotationally resolved threshold photoelectron spectra of OH and OD. *J. Chem. Phys.* 1992, 97, 768.

Wil1999: Wilmouth, D. M.; Hanisco, T. F.; Donahue, N. M.; Anderson, J. G. Fourier Transform Ultraviolet Spectroscopy of the  $a A^2\Pi_{3/2} \leftarrow X^2\Pi_{3/2}$  Transition of BrO. *J. Phys. Chem. A* 1999, 103, 8935–8945.

Workman1998: Workman, M.A. and Francisco, J.S. Molecular structure and energetics of BrO<sub>x</sub> radicals (where x = 1, 2, and 3). *Chemical Physics Letters* 1998, 293, 65–71.



Table S2. Computed spin densities with unrestricted wavefunctions of all atoms in the transition state of channel 1(b)  $\text{BrO} + \text{HO}_2 \rightarrow \text{HOBr} + \text{O}_2(\tilde{a}^1\Delta_g)$  (see text).

| Atom | Levels of theory |           |                             |                         |                             |                         |
|------|------------------|-----------|-----------------------------|-------------------------|-----------------------------|-------------------------|
|      | M06-2X/<br>AVDZ  | BD/AVDZ   | BD(T)/AVTZ//<br>M06-2X/AVDZ | BD(T)/AVTZ//<br>BD/AVDZ | BD(T)/AVQZ//<br>M06-2X/AVDZ | BD(T)/AVQZ//<br>BD/AVDZ |
| Br   | 0.365983         | 0.337768  | 0.370982                    | 0.000000                | 0.368173                    | 0.000000                |
| O    | 0.525253         | 0.404465  | 0.565513                    | 0.000000                | 0.569491                    | 0.000000                |
| H    | -0.011192        | -0.026403 | -0.015772                   | 0.000000                | -0.011449                   | 0.000000                |
| O    | -0.273028        | -0.220575 | -0.242201                   | 0.000000                | -0.255235                   | 0.000000                |
| O    | -0.607017        | -0.495256 | -0.678522                   | 0.000000                | -0.670981                   | 0.000000                |

Table S3. Computed (BD(TQ)/CBS//M06-2X/AVDZ incl. SO correction for BrO)  $k_{\text{outer}}$ ,  $k_{\text{inner}}$  and  $k_{\text{overall}}$  values in  $\text{cm}^3 \cdot \text{molecule}^{-1} \cdot \text{s}^{-1}$  of channel 1(b)  $\text{BrO} + \text{HO}_2 \rightarrow \text{HOBr} + \text{O}_2(\tilde{a}^1\Delta_g)$  at 200 – 400 K.  $k_{\text{outer}}$ ,  $k_{\text{inner}}$  were calculated from PST and E,J-TST respectively using VARIFLEX and  $k_{\text{overall}(i)}$  was calculated using equation (1).

| T (K) | $k_{\text{outer}}$ | $k_{\text{inner}}$ | $k_{\text{overall}(i)}$ |
|-------|--------------------|--------------------|-------------------------|
| 200   | 2.49E-10           | 7.39E-11           | 5.70E-11                |
| 210   | 2.51E-10           | 5.23E-11           | 4.33E-11                |
| 220   | 2.52E-10           | 3.83E-11           | 3.33E-11                |
| 230   | 2.54E-10           | 2.89E-11           | 2.60E-11                |
| 240   | 2.55E-10           | 2.24E-11           | 2.06E-11                |
| 250   | 2.57E-10           | 1.78E-11           | 1.67E-11                |
| 260   | 2.58E-10           | 1.44E-11           | 1.37E-11                |
| 270   | 2.59E-10           | 1.19E-11           | 1.14E-11                |
| 280   | 2.6E-10            | 9.98E-12           | 9.61E-12                |
| 298   | 2.62E-10           | 7.53E-12           | 7.32E-12                |
| 300   | 2.63E-10           | 7.31E-12           | 7.12E-12                |
| 310   | 2.63E-10           | 6.37E-12           | 6.22E-12                |
| 320   | 2.64E-10           | 5.61E-12           | 5.50E-12                |
| 330   | 2.65E-10           | 4.99E-12           | 4.90E-12                |
| 340   | 2.66E-10           | 4.48E-12           | 4.40E-12                |
| 350   | 2.67E-10           | 4.04E-12           | 3.98E-12                |
| 360   | 2.67E-10           | 3.68E-12           | 3.63E-12                |
| 370   | 2.68E-10           | 3.37E-12           | 3.33E-12                |
| 380   | 2.68E-10           | 3.11E-12           | 3.07E-12                |
| 390   | 2.69E-10           | 2.88E-12           | 2.85E-12                |
| 400   | 2.69E-10           | 2.68E-12           | 2.65E-12                |

Table S4. Computed (BD(TQ)/CBS//M06-2X/AVDZ incl. SO correction for BrO)  $k_{\text{inner}}$  values calculated with the E,J-TST (with VARIFLEX) and TST (with POLYRATE) methods in  $\text{cm}^3 \cdot \text{molecule}^{-1} \cdot \text{s}^{-1}$  for channel 1(b)  $\text{BrO} + \text{HO}_2 \rightarrow \text{HOBr} + \text{O}_2$  ( $\tilde{a}^1\Delta_g$ ) at 200 – 400 K. <sup>(a)</sup>

| T (K) | E,J-TST  | TST <sup>(b)</sup>  |
|-------|----------|---------------------|
| 200   | 7.39E-11 | 6.65E-11 (7.04E-11) |
| 210   | 5.23E-11 | 4.69E-11            |
| 220   | 3.83E-11 | 3.43E-11            |
| 230   | 2.89E-11 | 2.59E-11            |
| 240   | 2.24E-11 | 2.00E-11            |
| 250   | 1.78E-11 | 1.59E-11            |
| 260   | 1.44E-11 | 1.28E-11            |
| 270   | 1.19E-11 | 1.06E-11            |
| 280   | 9.98E-12 | 8.86E-12            |
| 298   | 7.53E-12 | 6.67E-12 (6.93E-12) |
| 300   | 7.31E-12 | 6.48E-12            |
| 310   | 6.37E-12 | 5.64E-12            |
| 320   | 5.61E-12 | 4.96E-12            |
| 330   | 4.99E-12 | 4.41E-12            |
| 340   | 4.48E-12 | 3.95E-12            |
| 350   | 4.04E-12 | 3.57E-12            |
| 360   | 3.68E-12 | 3.25E-12            |
| 370   | 3.37E-12 | 2.97E-12            |
| 380   | 3.11E-12 | 2.74E-12            |
| 390   | 2.88E-12 | 2.54E-12            |
| 400   | 2.68E-12 | 2.36E-12 (2.43E-12) |

- (a)  $\Delta\text{ZPE}$  is included in the barrier height (of  $-3.07 \text{ kcal}\cdot\text{mol}^{-1}$ ) used in the VARIFLEX (E,J-TST) calculations (column 2) but not in the POLYRATE (TST) calculations (column 3), which use the classical barrier height ( $-3.05 \text{ kcal}\cdot\text{mol}^{-1}$ ).
- (b) Values shown in brackets at 200, 298 and 400 K (in column 3) are from conventional TST calculations (with POLYRATE) with a barrier height ( $-3.07 \text{ kcal}\cdot\text{mol}^{-1}$ ) which is  $-3.05 \text{ kcal}\cdot\text{mol}^{-1}$  plus the  $\Delta\text{ZPE}$  contribution. These results show that the difference between the E,J-TST and TST results shown in the table arises from (i) a difference in the barrier height used as well as (ii) the microcanonical treatment of the reactants and TS in the E,J-TST method compared to a Boltzmann distribution in the reactants and TS used in the conventional TST method.

Table S5. Computed (BD(TQ)/CBS//M06-2X/AVDZ incl. SO correction for BrO) values of  $k_{\text{inner}}$  at various VTST levels (TST, CVT and ICVT) with and without CAG correction in  $\text{cm}^3 \cdot \text{molecule}^{-1} \cdot \text{s}^{-1}$  for channel 1(b)  $\text{BrO} + \text{HO}_2 \rightarrow \text{HOBr} + \text{O}_2 (\tilde{a}^1\Delta_g)$  at 200 – 400 K, calculated with POLYRATE.

| T (K) | TST        | TST/CAG    | CVT        | CVT/CAG    | ICVT       |
|-------|------------|------------|------------|------------|------------|
| 200   | 6.645E-11  | 7.4903E-12 | 8.462E-12  | 8.0651E-12 | 8.4618E-12 |
| 210   | 4.69E-11   | 5.8658E-12 | 6.5949E-12 | 6.298E-12  | 6.5947E-12 |
| 220   | 3.4291E-11 | 4.7138E-12 | 5.2752E-12 | 5.0468E-12 | 5.2751E-12 |
| 230   | 2.585E-11  | 3.8737E-12 | 4.316E-12  | 4.1358E-12 | 4.3159E-12 |
| 240   | 2.0014E-11 | 3.246E-12  | 3.6014E-12 | 3.4561E-12 | 3.6013E-12 |
| 250   | 1.5863E-11 | 2.7669E-12 | 3.0573E-12 | 2.938E-12  | 3.0573E-12 |
| 260   | 1.2834E-11 | 2.3942E-12 | 2.6352E-12 | 2.5355E-12 | 2.6352E-12 |
| 270   | 1.0575E-11 | 2.0993E-12 | 2.3021E-12 | 2.2175E-12 | 2.3021E-12 |
| 280   | 8.8565E-12 | 1.8626E-12 | 2.0352E-12 | 1.9625E-12 | 2.0352E-12 |
| 298   | 6.6681E-12 | 1.5409E-12 | 1.6733E-12 | 1.6164E-12 | 1.6733E-12 |
| 300   | 6.4773E-12 | 1.5115E-12 | 1.6404E-12 | 1.5848E-12 | 1.6404E-12 |
| 310   | 5.6408E-12 | 1.3795E-12 | 1.4924E-12 | 1.4431E-12 | 1.4924E-12 |
| 320   | 4.964E-12  | 1.2686E-12 | 1.3682E-12 | 1.3241E-12 | 1.3682E-12 |
| 330   | 4.4102E-12 | 1.1747E-12 | 1.2632E-12 | 1.2233E-12 | 1.2631E-12 |
| 340   | 3.952E-12  | 1.0944E-12 | 1.1735E-12 | 1.1372E-12 | 1.1735E-12 |
| 350   | 3.5692E-12 | 1.0253E-12 | 1.096E-12  | 9.9334E-13 | 1.0959E-12 |
| 360   | 3.2465E-12 | 9.6549E-13 | 1.0274E-12 | 9.3369E-13 | 1.0274E-12 |
| 370   | 2.9722E-12 | 9.1339E-13 | 9.6789E-13 | 8.8174E-13 | 9.6785E-13 |
| 380   | 2.7374E-12 | 8.6777E-13 | 9.1583E-13 | 8.3627E-13 | 9.158E-13  |
| 390   | 2.535E-12  | 8.2762E-13 | 8.7008E-13 | 7.9627E-13 | 8.7005E-13 |
| 400   | 2.3594E-12 | 7.9214E-13 | 8.297E-13  | 7.6092E-13 | 8.2967E-13 |



Table S6.

Computed (BD(TQ)/CBS//M06-2X/AVDZ incl. SO correction for BrO) values of  $k_{\text{inner}}$  at various VTST levels (TST, CVT and ICVT) with tunneling correction at the Wigner, ZCT and SCT levels in  $\text{cm}^3 \cdot \text{molecule}^{-1} \cdot \text{s}^{-1}$  for channel 1(b)  $\text{BrO} + \text{HO}_2 \rightarrow \text{HOBr} + \text{O}_2(\tilde{a}^1\Delta_g)$  at 200 – 400 K calculated with POLYRATE.

| T (K) | TST/W    | TST/ZCT  | CVT/ZCT  | ICVT/ZCT | TST/SCT  | CVT/SCT  | ICVT/SCT |
|-------|----------|----------|----------|----------|----------|----------|----------|
| 200   | 7.39E-11 | 7.49E-12 | 8.07E-12 | 8.46E-12 | 7.49E-12 | 8.07E-12 | 8.46E-12 |
| 210   | 5.17E-11 | 5.87E-12 | 6.30E-12 | 6.59E-12 | 5.87E-12 | 6.30E-12 | 6.59E-12 |
| 220   | 3.75E-11 | 4.71E-12 | 5.05E-12 | 5.28E-12 | 4.71E-12 | 5.05E-12 | 5.28E-12 |
| 230   | 2.81E-11 | 3.87E-12 | 4.14E-12 | 4.32E-12 | 3.87E-12 | 4.14E-12 | 4.32E-12 |
| 240   | 2.16E-11 | 3.25E-12 | 3.46E-12 | 3.60E-12 | 3.25E-12 | 3.46E-12 | 3.60E-12 |
| 250   | 1.70E-11 | 2.77E-12 | 2.94E-12 | 3.06E-12 | 2.77E-12 | 2.94E-12 | 3.06E-12 |
| 260   | 1.37E-11 | 2.39E-12 | 2.54E-12 | 2.64E-12 | 2.39E-12 | 2.54E-12 | 2.64E-12 |
| 270   | 1.12E-11 | 2.10E-12 | 2.22E-12 | 2.30E-12 | 2.10E-12 | 2.22E-12 | 2.30E-12 |
| 280   | 9.37E-12 | 1.86E-12 | 1.96E-12 | 2.04E-12 | 1.86E-12 | 1.96E-12 | 2.04E-12 |
| 298   | 7.01E-12 | 1.54E-12 | 1.62E-12 | 1.67E-12 | 1.54E-12 | 1.62E-12 | 1.67E-12 |
| 300   | 6.80E-12 | 1.51E-12 | 1.58E-12 | 1.64E-12 | 1.51E-12 | 1.58E-12 | 1.64E-12 |
| 310   | 5.91E-12 | 1.38E-12 | 1.44E-12 | 1.49E-12 | 1.38E-12 | 1.44E-12 | 1.49E-12 |
| 320   | 5.18E-12 | 1.27E-12 | 1.32E-12 | 1.37E-12 | 1.27E-12 | 1.32E-12 | 1.37E-12 |
| 330   | 4.59E-12 | 1.17E-12 | 1.22E-12 | 1.26E-12 | 1.17E-12 | 1.22E-12 | 1.26E-12 |
| 340   | 4.11E-12 | 1.09E-12 | 1.14E-12 | 1.17E-12 | 1.09E-12 | 1.14E-12 | 1.17E-12 |
| 350   | 3.70E-12 | 1.03E-12 | 9.93E-13 | 1.10E-12 | 1.03E-12 | 9.93E-13 | 1.10E-12 |
| 360   | 3.36E-12 | 9.65E-13 | 9.34E-13 | 1.03E-12 | 9.65E-13 | 9.34E-13 | 1.03E-12 |
| 370   | 3.07E-12 | 9.13E-13 | 8.82E-13 | 9.68E-13 | 9.13E-13 | 8.82E-13 | 9.68E-13 |
| 380   | 2.82E-12 | 8.68E-13 | 8.36E-13 | 9.16E-13 | 8.68E-13 | 8.36E-13 | 9.16E-13 |
| 390   | 2.61E-12 | 8.28E-13 | 7.96E-13 | 8.70E-13 | 8.28E-13 | 7.96E-13 | 8.70E-13 |
| 400   | 2.43E-12 | 7.92E-13 | 7.61E-13 | 8.30E-13 | 7.92E-13 | 7.61E-13 | 8.30E-13 |

Table S7. Computed (BD(TQ)/CBS//M06-2X/AVDZ incl. SO correction for BrO)  $k_{\text{overall(ii)}}$  values obtained from  $k_{\text{outer}}$  and  $k_{\text{inner}}$  from equ.(1) for channel 1(b)  $\text{BrO} + \text{HO}_2 \rightarrow \text{HOBr} + \text{O}_2(\tilde{a}^1\Delta_g)$  at 200 – 400 K.

$k_{\text{outer}}$  was obtained from PST calculations with VARIFLEX and  $k_{\text{inner}}$  was obtained from ICVT/SCT calculations with POLYRATE.

| T (K) | $k_{\text{outer}}$ | $k_{\text{inner}}$ | $k_{\text{overall(ii)}}$ |
|-------|--------------------|--------------------|--------------------------|
| 200   | 2.49E-10           | 8.46E-12           | 8.18E-12                 |
| 210   | 2.51E-10           | 6.59E-12           | 6.42E-12                 |
| 220   | 2.52E-10           | 5.28E-12           | 5.17E-12                 |
| 230   | 2.54E-10           | 4.32E-12           | 4.25E-12                 |
| 240   | 2.55E-10           | 3.60E-12           | 3.55E-12                 |
| 250   | 2.57E-10           | 3.06E-12           | 3.02E-12                 |
| 260   | 2.58E-10           | 2.64E-12           | 2.61E-12                 |
| 270   | 2.59E-10           | 2.30E-12           | 2.28E-12                 |
| 280   | 2.6E-10            | 2.04E-12           | 2.02E-12                 |
| 298   | 2.62E-10           | 1.67E-12           | 1.66E-12                 |
| 300   | 2.63E-10           | 1.64E-12           | 1.63E-12                 |
| 310   | 2.63E-10           | 1.49E-12           | 1.48E-12                 |
| 320   | 2.64E-10           | 1.37E-12           | 1.36E-12                 |
| 330   | 2.65E-10           | 1.26E-12           | 1.25E-12                 |
| 340   | 2.66E-10           | 1.17E-12           | 1.16E-12                 |
| 350   | 2.67E-10           | 1.10E-12           | 1.10E-12                 |
| 360   | 2.67E-10           | 1.03E-12           | 1.03E-12                 |
| 370   | 2.68E-10           | 9.68E-13           | 9.65E-13                 |
| 380   | 2.68E-10           | 9.16E-13           | 9.13E-13                 |
| 390   | 2.69E-10           | 8.70E-13           | 8.67E-13                 |
| 400   | 2.69E-10           | 8.30E-13           | 8.27E-13                 |

Table S8.

A summary of values obtained for channel 1(b)  $\text{BrO} + \text{HO}_2 \rightarrow \text{HOBr} + \text{O}_2$  ( $\tilde{a}^1\Delta_g$ ) using POLYRATE and employing the BD(TQ)/CBS//M06-2X/AVDZ (incl. SO correction for BrO) IRC (see text).

|                                            | BD(TQ)/CBS    |
|--------------------------------------------|---------------|
| $\Delta E_e^{\#a}$                         | -3.05         |
| $\Delta E_0^{\#a}$                         | -3.07         |
| $s^*(V_aG)$                                | -0.5516       |
| $V_aG(s^*) - V_aG@s=0\text{\AA}$           | 0.8558        |
| $\kappa\text{CVT}\approx\kappa\text{ICVT}$ | Yes           |
| $\kappa\text{ZCT}=\kappa\text{SCT}=1.0$    | Yes           |
| $\kappa\text{TST}/\text{CAG},200\text{K}$  | 1.1219E-01    |
| $\kappa\text{CVT}/\text{CAG},200\text{K}$  | 9.7397E-01    |
| $k\text{TST},200\text{K}$                  | 6.6450E-11    |
| $k\text{TST}/\text{CAG},200\text{K}$       | 7.4550E-12    |
| $k\text{CVT},200\text{K}$                  | 8.8185E-12    |
| $k\text{ICVT}/\text{SCT},200\text{K}$      | 8.8184E-12    |
| $\kappa\text{TST}/\text{CAG},400\text{K}$  | 3.3495E-01    |
| $\kappa\text{CVT}/\text{CAG},400\text{K}$  | 9.1174E-01    |
| $k\text{TST},400\text{K}$                  | 2.3594E-12    |
| $k\text{TST}/\text{CAG},400\text{K}$       | 7.9026E-13    |
| $k\text{CVT},400\text{K}$                  | 8.3344E-13    |
| $k\text{ICVT}/\text{SCT},400\text{K}$      | 8.3342E-13    |
| $\omega_i/\text{cm}^{-1}$                  | 228.51i       |
| T/K with $\kappa\text{TST}/W\leq 1.2$      | 200 K – 400 K |

<sup>a</sup> Computed classical barrier height,  $\Delta E_e^{\#}$  (electronic energy differences at  $s = 0$ , including spin-orbit contribution for BrO), and  $\Delta E_0^{\#}$  (classical barrier height with zero-point correction, including spin-orbit contribution for BrO) in  $\text{kcal.mol}^{-1}$ .  $s^*(V_aG)$  is the position of the maximum of the  $V_aG$  curve (denoted as  $V_aG(s^*)$ ) in  $\text{\AA}$ . Computed rate coefficients,  $k$ 's, are in  $\text{cm}^3\text{molecule}^{-1}\text{s}^{-1}$ .

Table S9. Computed (BQ(TQ)/CBS//M06-2X/AVDZ incl. SO correction for BrO) maximum change of Gibbs free energy of activation ( $\Delta G^\ddagger$ ) in kcal.mol<sup>-1</sup> of channel 1(b)  $\text{BrO} + \text{HO}_2 \rightarrow \text{HOBr} + \text{O}_2$  ( $\tilde{a}^1\Delta_g$ ) along the reaction coordinate and corresponding location of  $s^*(\Delta G^*)$  in Å from 200 K to 400 K from POLYRATE calculations.

| T (K) | $s^*(\Delta G^*)$ | $\Delta G^*$ |
|-------|-------------------|--------------|
| 200   | -0.495            | 21.6623      |
| 210   | -0.495            | 22.8685      |
| 220   | -0.405            | 24.076       |
| 230   | -0.405            | 25.2839      |
| 240   | -0.36             | 26.4912      |
| 250   | -0.36             | 27.6988      |
| 260   | -0.36             | 28.9062      |
| 270   | -0.36             | 30.1129      |
| 280   | -0.36             | 31.3192      |
| 298   | -0.36             | 33.489       |
| 300   | -0.36             | 33.73        |
| 310   | -0.36             | 34.9347      |
| 320   | -0.36             | 36.1388      |
| 330   | -0.36             | 37.3425      |
| 340   | -0.36             | 38.5456      |
| 350   | -0.36             | 39.7484      |
| 360   | -0.36             | 40.9506      |
| 370   | -0.36             | 42.1524      |
| 380   | -0.36             | 43.3538      |
| 390   | -0.36             | 44.5548      |
| 400   | -0.36             | 45.7553      |

## Figures

Figure S1. Triplet reactant complex (RC), triplet transition state (TS) and triplet product complex (PC) of channel 1(a)  $\text{BrO} + \text{HO}_2 \rightarrow \text{HOBr} + \text{O}_2$  ( $^3\Sigma_g^-$ ) at the M06-2X/AVDZ,AVDZ-PP level. Bond distances are shown Angstroms (Å).

Figure S2. Triplet transition states (TSs) of the channel 1(a)  $\text{BrO} + \text{HO}_2 \rightarrow \text{HOBr} + \text{O}_2$  ( $^3\Sigma_g^-$ ) at the M06-2X/AVDZ, AVDZ-PP (upper) and BD/AVDZ,AVDZ-PP levels (lower). Bond distances are shown in Angstroms (Å).

Figure S3. Open-shell singlet reactant complex (RC), open-shell singlet transition state (TS), and closed-shell singlet product complex (PC) of channel 1(b)  $\text{BrO} + \text{HO}_2 \rightarrow \text{HOBr} + \text{O}_2$  ( $\tilde{a}^1\Delta_g$ ) at the M06-2X/AVDZ,AVDZ-PP level. Bond distances are shown in Angstroms (Å).

Figure S4. Triplet transition states (TSs) of channel 1(b)  $\text{BrO} + \text{HO}_2 \rightarrow \text{HOBr} + \text{O}_2$  ( $\tilde{a}^1\Delta_g$ ) at the M06-2X/AVDZ, AVDZ-PP (upper) and BD/AVDZ,AVDZ-PP levels (lower). Bond distances are shown in Angstroms (Å).

Figure S5. Open-shell singlet reactant complex (RC), open-shell singlet transition state (TS), and closed-shell singlet product complex (PC) of channel (2)  $\text{BrO} + \text{HO}_2 \rightarrow \text{HBr} + \text{O}_3$  at the M06-2X/AVDZ, AVDZ-PP level. Bond distances are shown in Angstroms (Å).

Figure S6. Separate reactants, triplet transition state (TS) and separate products of channel (4)  $\text{BrO} + \text{HO}_2 \rightarrow \text{BrOO} + \text{OH}$  at the M06-2X/AVDZ, AVDZ-PP level. Bond distances are shown in Angstroms (Å).

Figure S7. Separate reactants, triplet transition state (TS) and separate products of channel (3)  $\text{BrO}$

+ HO<sub>2</sub> → OBrO + OH at M06-2X/AVDZ, AVDZ-PP level. Bond distances are shown in Angstroms (Å).

Figure S8. Computed (BD(TQ)/CBS//M06-2X/CBS incl. SO correction for BrO)  $k_{\text{outer}}$ ,  $k_{\text{inner}}$ , and  $k_{\text{overall(i)}}$  (cm<sup>3</sup>molecule<sup>-1</sup>s<sup>-1</sup>) versus T (K) curves of the channel 1(b) BrO + HO<sub>2</sub> → HOBr + O<sub>2</sub> ( $\tilde{a}^1\Delta_g$ ).  $k_{\text{outer}}$  was evaluated at the PST level with VARIFLEX,  $k_{\text{inner}}$  was evaluated at the E,J-TST level with VARIFLEX and  $k_{\text{overall(i)}}$  was calculated from  $k_{\text{outer}}$  and  $k_{\text{inner}}$  with equ.(1).

Figure S9. Computed  $k_{\text{inner}}$  (BD(TQ)/CBS//M06-2X/CBS incl. SO correction for BrO) values (cm<sup>3</sup>molecule<sup>-1</sup>s<sup>-1</sup>) with TST for channel 1(b) BrO + HO<sub>2</sub> → HOBr + O<sub>2</sub> ( $\tilde{a}^1\Delta_g$ ).

E,J-TST (with zero-point corrected barrier height) values were obtained with VARIFLEX and TST values (with the classical barrier height, which does not include zero-point correction) were obtained with POLYRATE.

Figure S10. Computed (BD(TQ)/CBS//M06-2X/CBS incl. SO correction for BrO)  $k_{\text{overall(ii)}}$  (cm<sup>3</sup>molecule<sup>-1</sup>s<sup>-1</sup>) versus T (K) curves for channel 1(b) BrO + HO<sub>2</sub> → HOBr + O<sub>2</sub> ( $\tilde{a}^1\Delta_g$ ).

$k_{\text{outer}}$  is evaluated with PST using VARIFLEX and  $k_{\text{inner}}$  is evaluated using ICVT/SCT with POLYRATE.  $k_{\text{overall(ii)}}$  is obtained from  $k_{\text{outer}}$ , and  $k_{\text{inner}}$ , using equ.(1).

(The  $k_{\text{overall(ii)}}$  values (blue triangles) are virtually superimposed on the  $k_{\text{inner}}$  values (red circles) in this figure).

Figure S1.

### M06-2X/AVDZ,AVDZ-PP

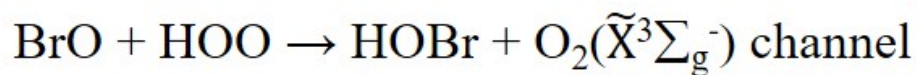

Reactant complex: triplet

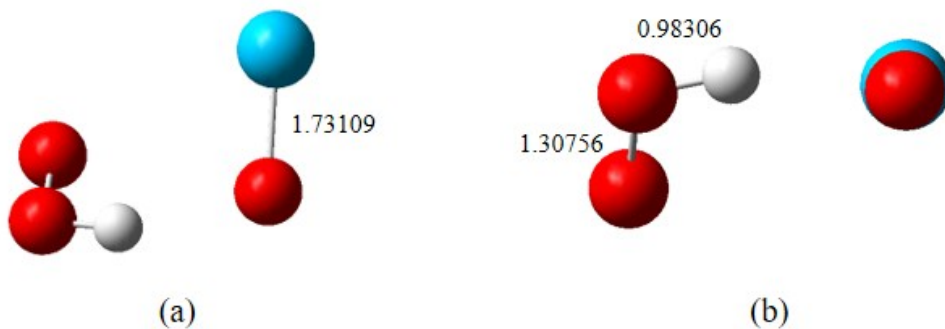

Transition state: triplet

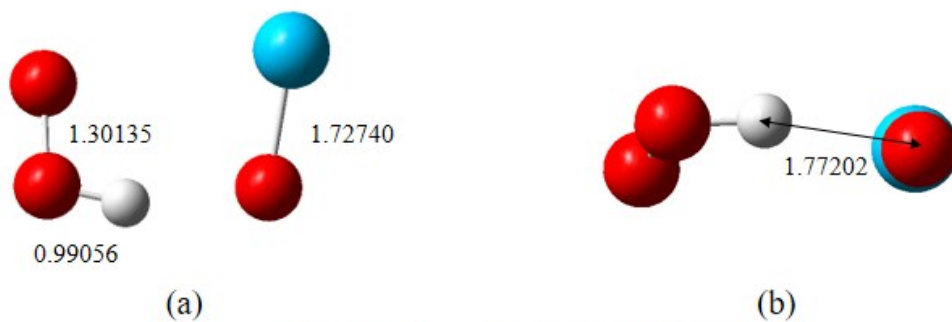

Product complex: triplet

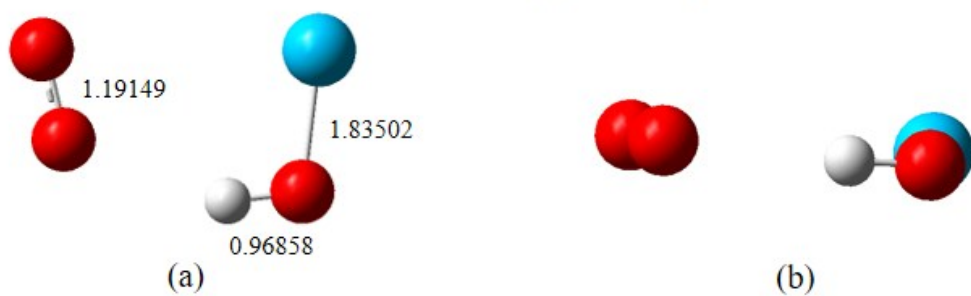

Figure S2.

### Triplet Transition States

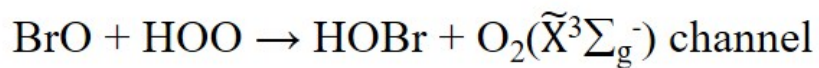

Transition state (M06-2X/AVDZ,AVDZ-PP)

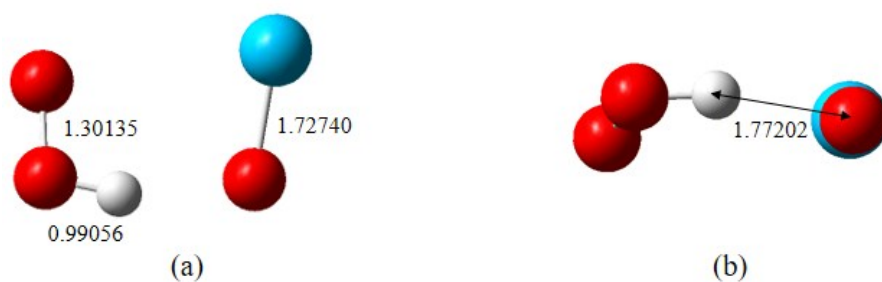

Transition state (BD/AVDZ,AVDZ-PP)

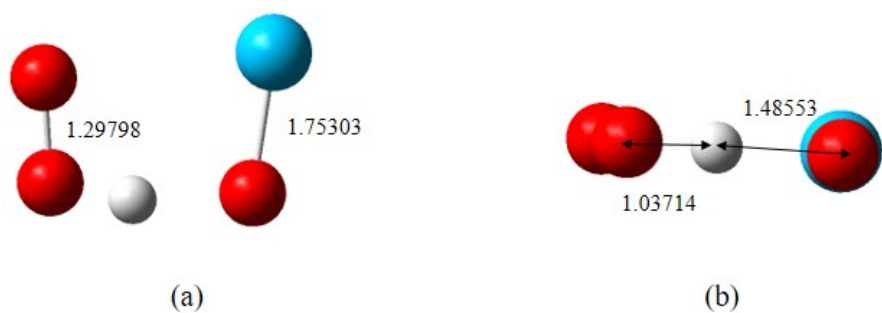



Figure S3.

### M06-2X/AVDZ,AVDZ-PP

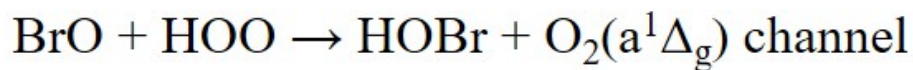

Reactant complex: open-shell singlet

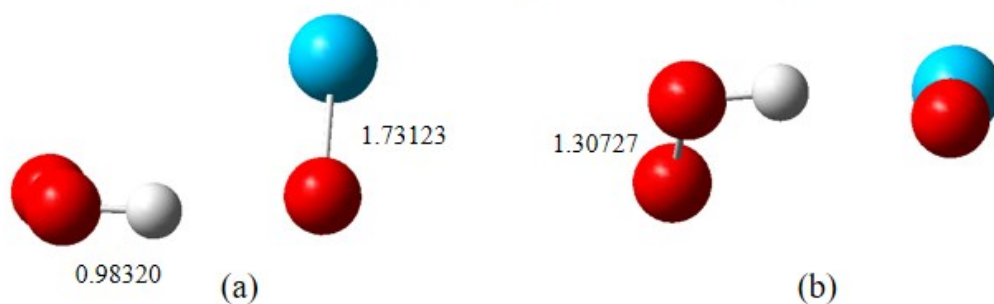

Transition state: open-shell singlet

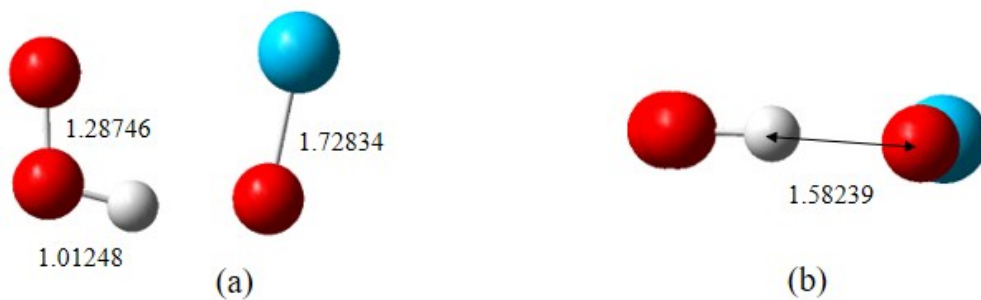

Product complex: closed-shell singlet

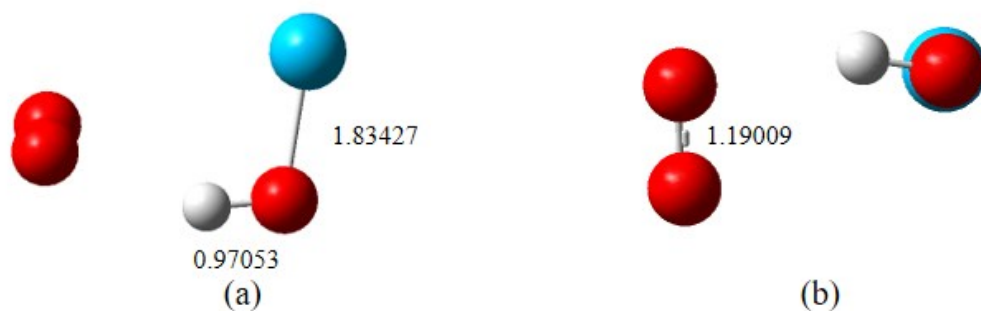

Figure S4.

### Singlet Transition States

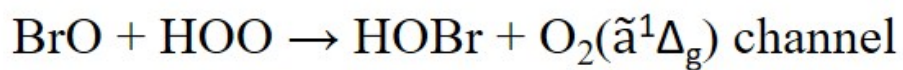

Transition state (M06-2X/AVDZ,AVDZ-PP)

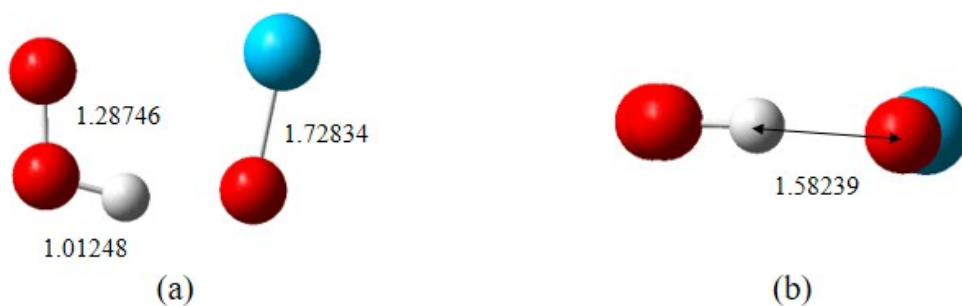

Transition state (BD/AVDZ,AVDZ-PP)

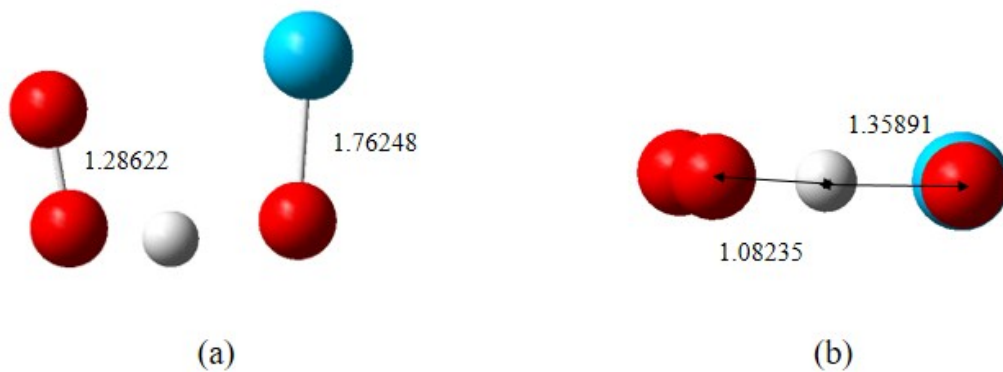

Figure S5.

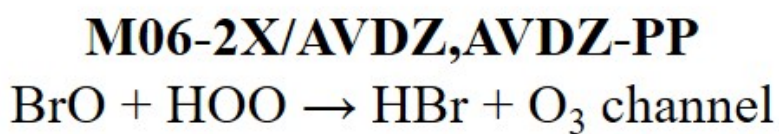

Intermediate: closed-shell singlet

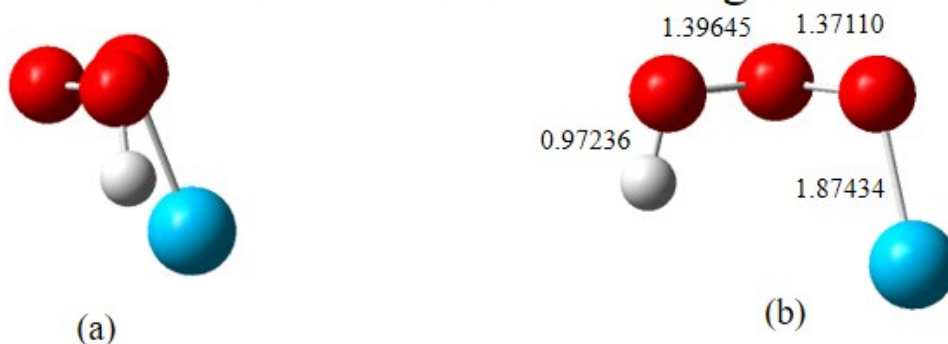

Transition state: closed-shell singlet

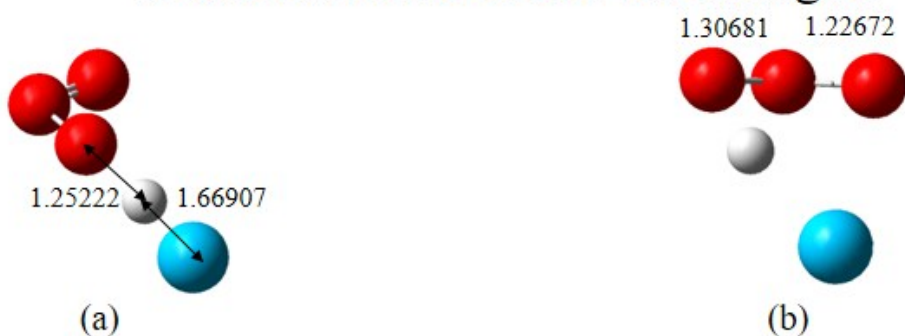

Product complex: closed-shell singlet

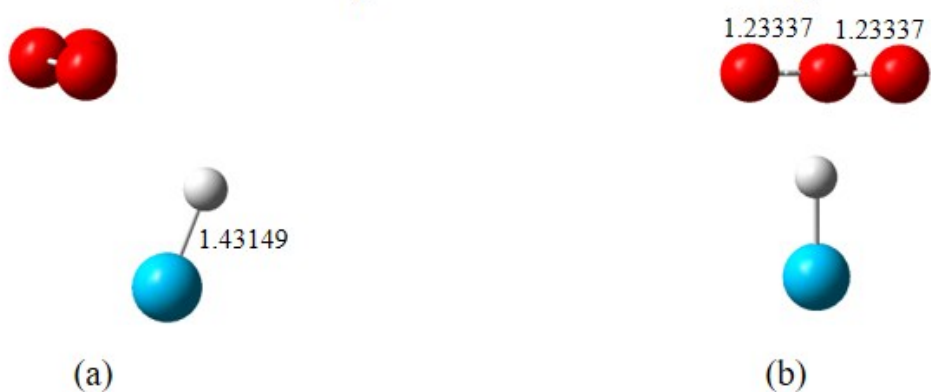

Figure S6.

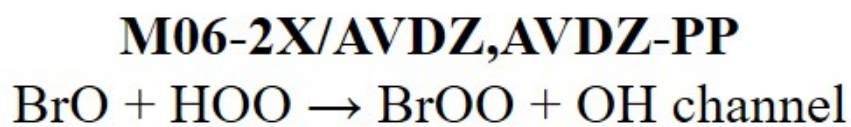

Separate Reactants

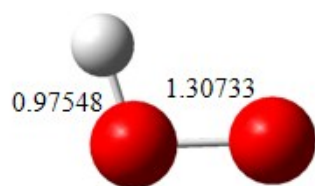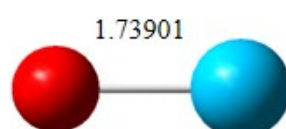

Transition State: Triplet

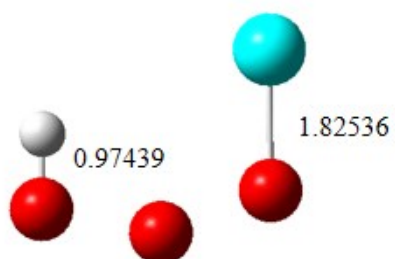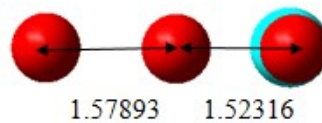

Separate Products

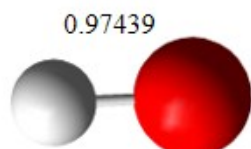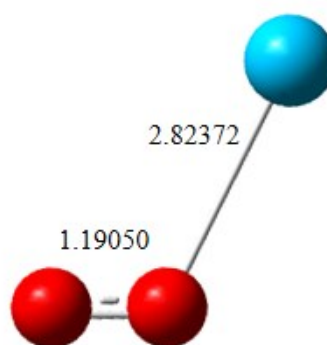

Figure S7.

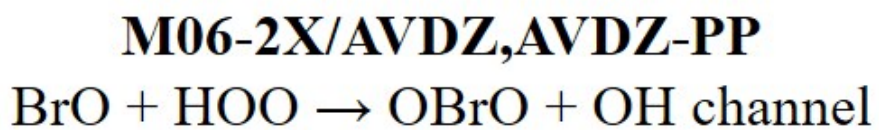

Separate Reactants

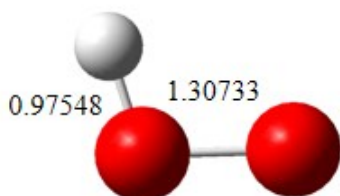

HO<sub>2</sub>

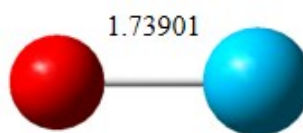

BrO

Transition State: Triplet

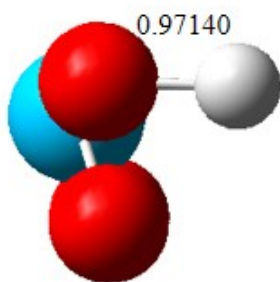

(a)

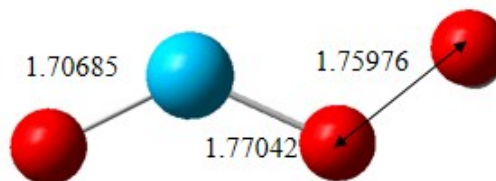

(b)

Separate Products

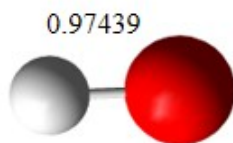

OH

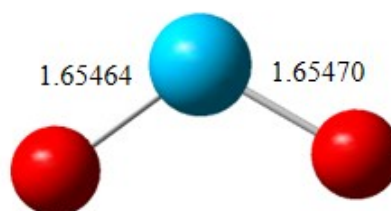

OBrO

Figure S8.

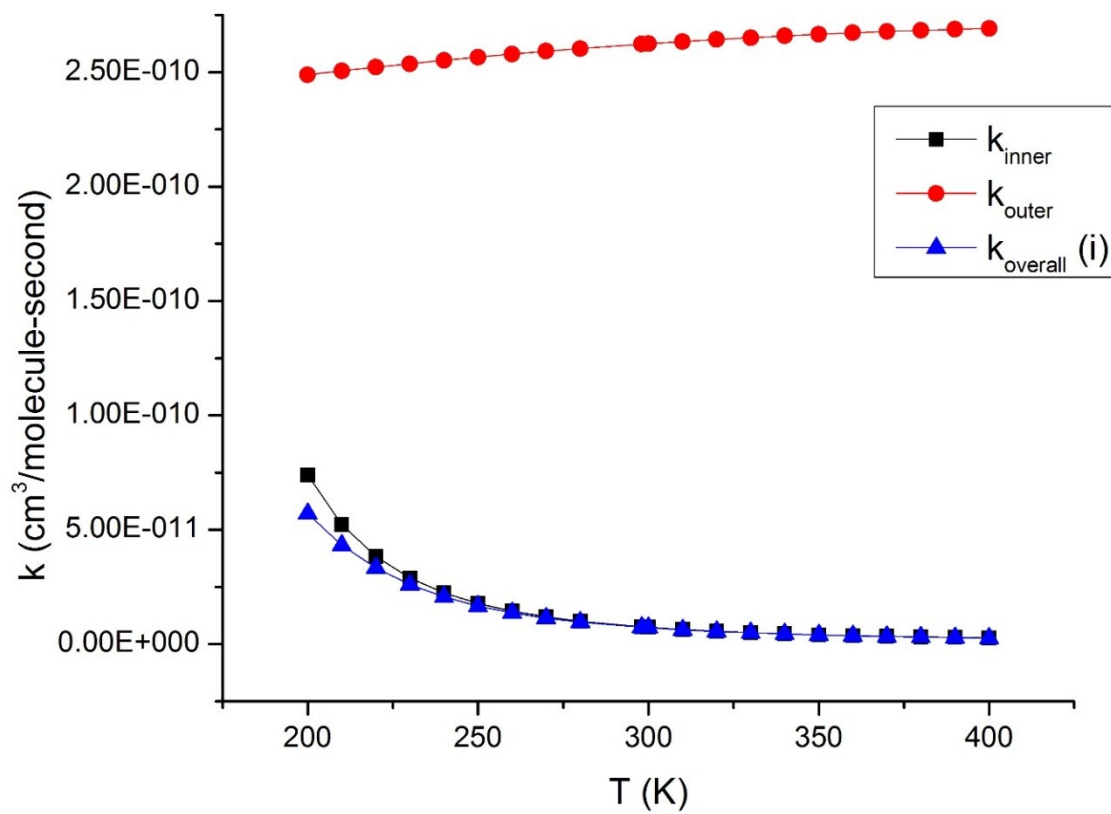

Figure S9.

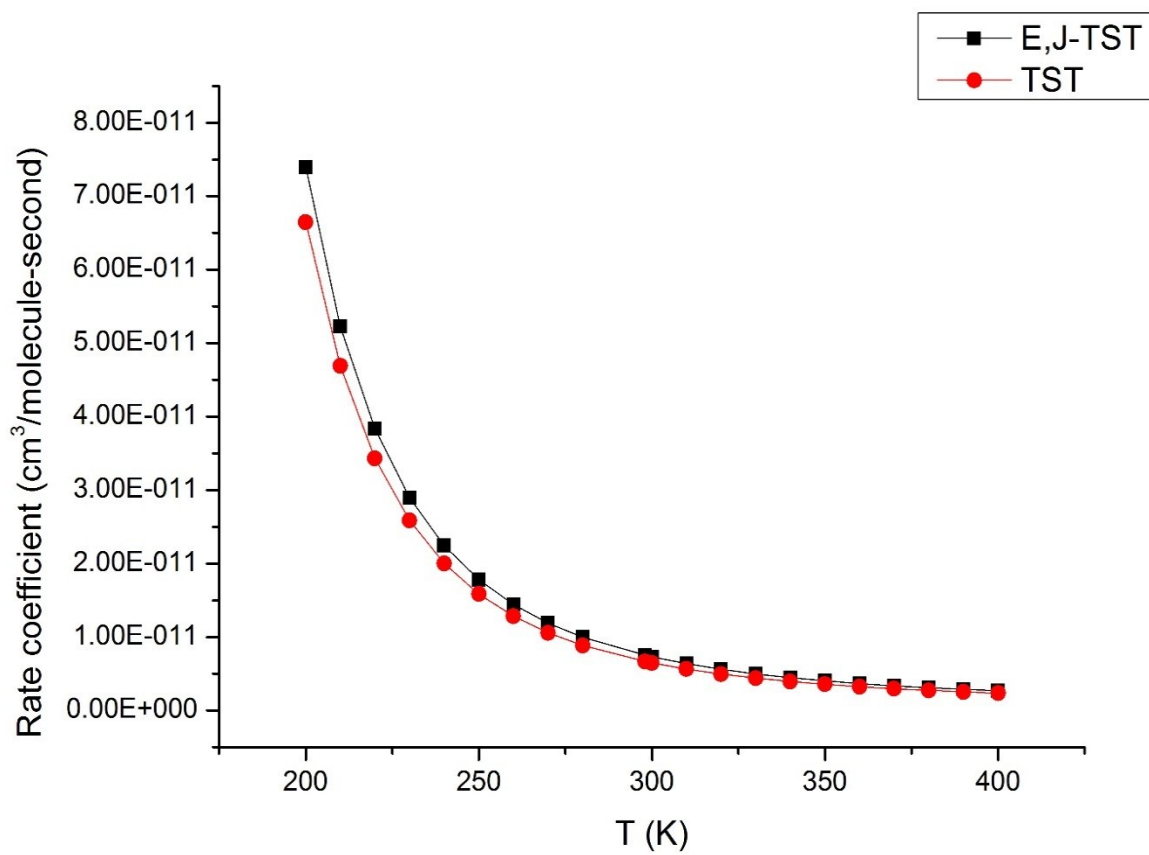

Figure S10.

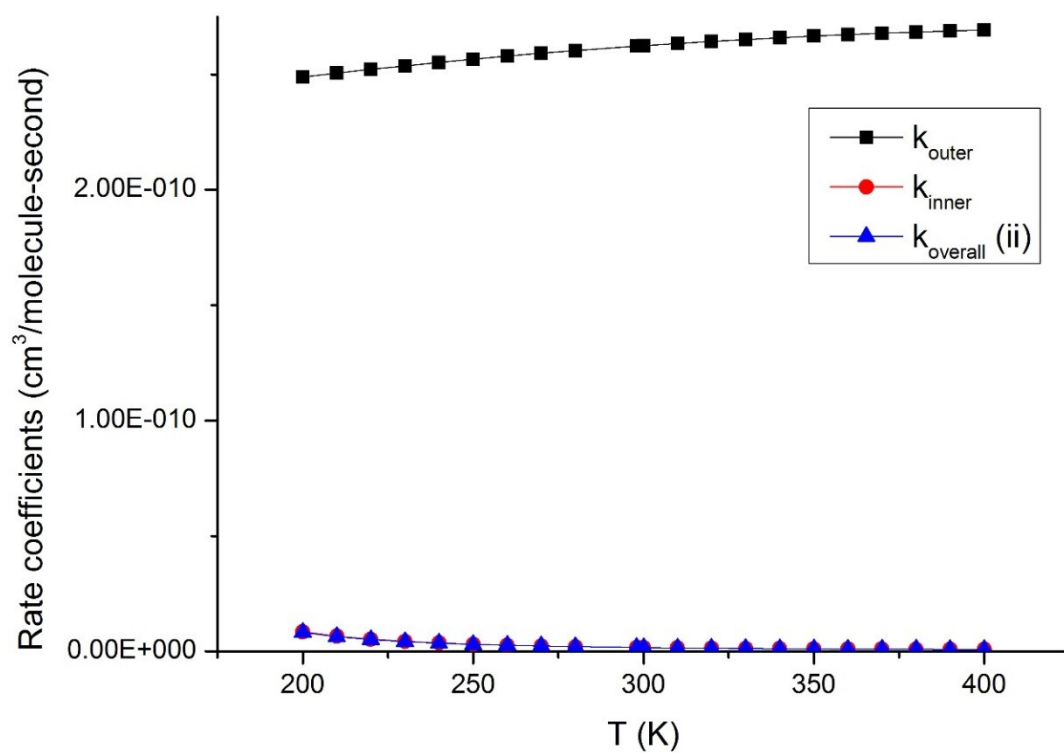



## Some considerations on the MR characters in the TSs of channel 1(a) and channels 1(b) by CASSCF and/or CASSCF/NEVPT2 calculations

### The TS of channel: 1(a)

1. At the M06-2X/AVDZ geometry of the TS of channel 1(a): Some CASSCF/AVDZ calculations with different active spaces were carried out. The computed largest CI coefficients are given below:

CASSCF(2,4):

|      |           |
|------|-----------|
| aa00 | 0.9999985 |
|------|-----------|

CASSCF(4,6):

|        |            |
|--------|------------|
| 2aa000 | 0.9861989  |
| 0aa200 | -0.1375082 |
| aa0ba0 | 0.0532421  |

CASSCF(6,8):

CI vector

|          |            |
|----------|------------|
| 22aa0000 | 0.9820148  |
| 20aa2000 | -0.1176717 |
| 02aa0200 | -0.0581623 |

Conclusion: Although the T1 values obtained from CCSD(T) calculations are large at the M06-2X/AVDZ geometry, CI coefficients obtained from CASSCF calculations with different active spaces suggest that MR character is not very large. In this connection, BD methods are expected to be adequate.

2. At the BD/AVDZ geometry of the TS of channel 1(a): Some RHF/CCSD(T) calculations were carried out on the TS of channel 1(a) at the BD/AVDZ geometry. Although initially there were SCF convergence problems in these RHF calculations, they were overcome by using the CASSCF(2,2) wavefunction as the initial guess for the RHF calculation. Subsequent RHF/CCSD(T) calculations with different basis sets (AVTZ and AVQZ) at the BD/AVDZ geometry with the converged RHF wavefunction give T1 diagnostic values of  $\sim 0.053$ , which is substantially smaller than the values obtained at the M06-2X/AVDZ geometry, suggesting that at the BD/AVDZ geometry, MR character for this triplet TS is acceptably small. In this connection, the BD(T) and BD(TQ) methods are expected to be adequate.

### The TS of channel 1(b)

Since the TS structures of channel 1(b) obtained at the M06-2X/AVDZ and BD/AVDZ level are qualitatively similar (as discussed in the paper) and the M06-2X TS geometry gave open-shell singlet states at the BD/AVTZ and BD/AVQZ levels, some CASSCF/NEVPT2 singlet calculations were carried out on the TS of channel 1(b) using MOLPRO at the M06-2X geometry. At the same time, similar CASSCF/NEVPT2 calculations were carried out for the separate reactants at a 50 Å separation in the super molecule approach, in order to obtain the relative energies of the TS with respect to the separate reactants. The CASSCF/NEVPT2 results are summarized below.

The CASSCF orbitals and major computed CI vectors from CASSCF(2,4) calculations with different basis sets are very similar. The two highest occupied CASSCF/AVDZ natural orbitals and their electron occupancies are given below:

(25a)<sup>1.07</sup>

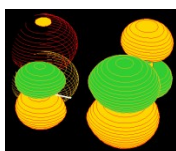

(26a)<sup>0.93</sup>

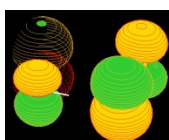

The largest CI coefficients of the open-shell singlet state are:

|      |       |
|------|-------|
| 2000 | 0.73  |
| 0200 | -0.68 |

The computed relative electronic energies (in kcal.mol<sup>-1</sup>) of the TS of channel 1(b) (w.r.t. separate reactants) obtained at the CASSCF and CASSCF/NEVPT2 levels of calculation with different basis sets are summarized in the following Table:

| Basis sets                        | CASSCF | CASSCF/NEVPT2 |
|-----------------------------------|--------|---------------|
| AVDZ                              | 8.66   | -2.303        |
| AVTZ                              | 9.08   | -2.995        |
| AVQZ                              | 9.16   | -3.033        |
| CBS(1/X <sup>3</sup> : AVQZ/AVTZ) |        | -3.062        |

The best computed NEVPT2/CBS//M06-2X/AVDZ relative energy of  $-3.06 \text{ kcal.mol}^{-1}$  as shown in the above Table agrees almost exactly with the best computed BD(TQ)/CBS//M06-2X/AVDZ value of  $-3.05 \text{ kcal.mol}^{-1}$  (see Table 2 of the paper). In conclusion, single reference BD(TQ)/CBS results and MR CASSCF/NEVPT2 results for channel 1(b) are very consistent. Therefore, for the sake of simplicity and consistency (with other reactions considered in the present investigation), only the BD(TQ)/CBS results are discussed in the paper.
